# Supplementary material
Source: MDPI journal article supplement (https://www.mdpi.com/2076-3417/8/1/77)
Supplement: s1 [file s1]

# Supplementary Materials: New insights in the ion beam sputtering deposition of ZnO-fluoropolymer nanocomposites

Maria Chiara Sportelli<sup>1</sup>, Marco Valentini<sup>2,3</sup>, Rosaria Anna Picca<sup>1</sup>, Antonella Milella<sup>1</sup>, Angelo Nacci<sup>1</sup>, Antonio Valentini<sup>2,3</sup>, Nicola Cioffi<sup>1,\*</sup>

**Eq. S1.** Detail of  $\varphi$  calculation.  $V_{PTFE}$  and  $V_{ZnO}$  are the deposited volumes of PTFE and ZnO, and  $r_{PTFE}$  and  $r_{ZnO}$  are the deposition rates of the two materials, experimentally measured for any deposition run and expressed as film thickness per second.

$$\varphi = \frac{V_{ZnO}}{V_{PTFE} + V_{ZnO}} = \frac{r_{ZnO}}{r_{PTFE} + r_{ZnO}} = \frac{r_{ZnO}/r_{PTFE}}{1 + (r_{ZnO}/r_{PTFE})} \quad (s1)$$

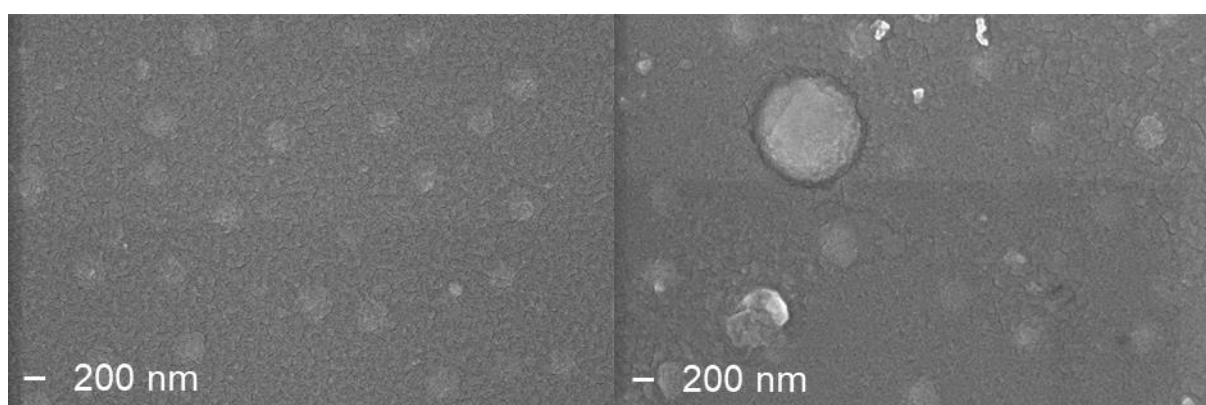

**Figure S1.** 150-nm-thick ZnO-CFx composite films were morphologically characterized by SEM analysis, at 30 kV with a Hitachi SEM-FEG 5000 microscope on gold-coated sample.

**Table S1.** Relative abundances (%) of different carbon moieties, derived from the C1s curve-fitting, as a function of  $\varphi$ .

| $\Phi$ | CF <sub>3</sub> | CF <sub>2</sub> | CF,<br>COOH | CF=C,<br>C=O | C-CF,<br>C-OH <sup>1</sup> | C-C        |
|--------|-----------------|-----------------|-------------|--------------|----------------------------|------------|
| 0.05   | 10.5 ± 0.3      | 29.4 ± 0.5      | 16.7 ± 0.4  | 9.6 ± 0.9    | /                          | 11.1 ± 0.3 |
| 0.10   | 20.6 ± 0.5      | 11.7 ± 0.4      | 6.7 ± 0.9   | 4.1 ± 0.2    | 6.9 ± 0.2                  | 50.0 ± 1.3 |
| 0.15   | 3.9 ± 1.1       | 6.0 ± 1.5       | 8.9 ± 0.2   | 9.8 ± 1.0    | 39.7 ± 2.2                 | 31.7 ± 1.8 |

<sup>1</sup> For a metal oxide volume fraction of  $\varphi = 0.05$  this ambiguous component is present as two distinct chemical environments, centered at  $286.4 \pm 0.2$  eV (C-OH) and  $287.4 \pm 0.2$  eV (C-CF), whose relative abundances are  $6.3 \pm 0.2$  and  $16.4 \pm 0.4$ , respectively.

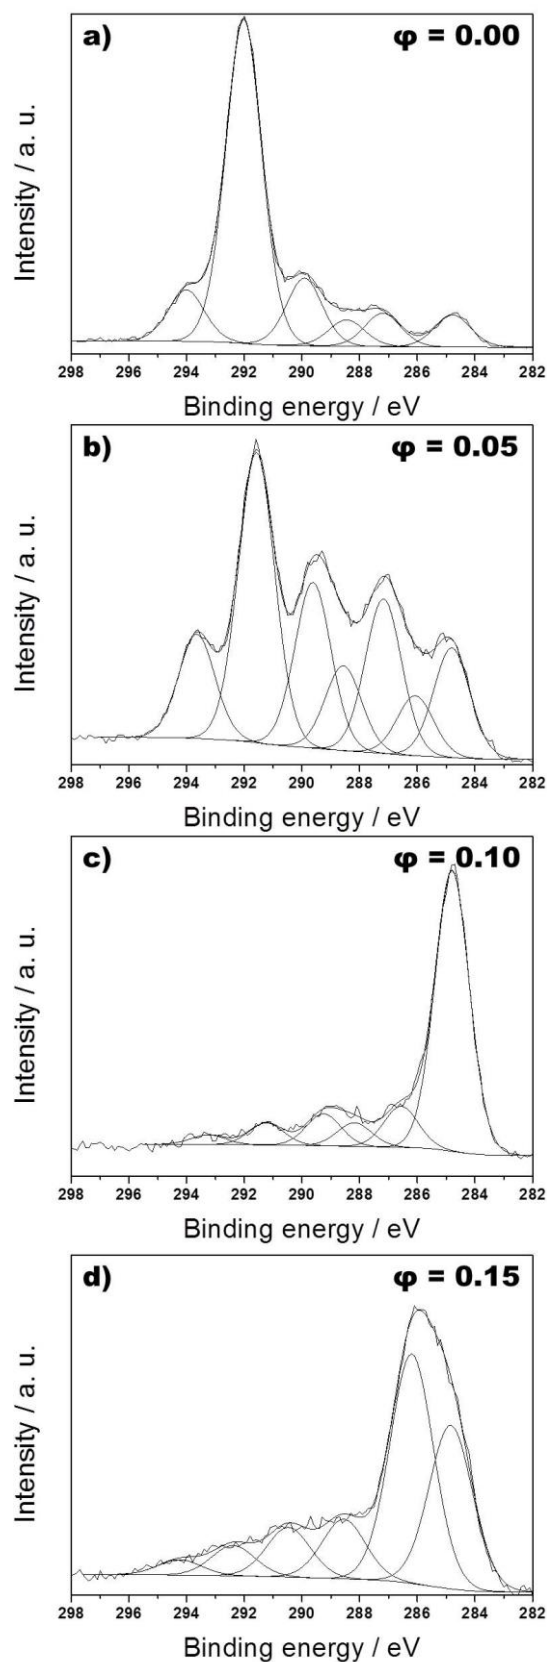

**Figure S2.** C1s XP-high resolution regions of ZnO-CFx nanocomposites having an inorganic phase volume fraction  $\varphi = 0$  (a),  $\varphi = 0.05$  (b),  $\varphi = 0.10$  (c), and  $\varphi = 0.15$  (d).

#### Details on C1s XP spectral deconvolution

The first two components from the left-side of each spectra, falling at  $293.8 \pm 0.2$  eV and  $291.8 \pm 0.1$  eV, were attributed to  $-\text{CF}_3$  chain-terminations and  $-\text{CF}_2$  groups, respectively. Their intensity decreased significantly as  $\varphi$  increased. The spectral region falling at lower BE values comprised several peaks, with equivocal attribution. Both fluorinated and oxygenated species were expected to contribute to them. The peak at  $289.6 \pm 0.2$  eV was attributed to  $-\text{CF}$  functionalities or to carboxyl moieties. Unsaturated fluorinated carbon ( $\text{CF}=\text{C}$ ) and carbonyl groups were both responsible for the peak centered at  $288.0 \pm 0.3$  eV (the presence of large amounts of  $\text{C}=\text{O}$  groups is confirmed by the analysis of the  $\text{O}1\text{s}$  region, data not shown). Fluorine- $\alpha$ -substituted carbon ( $\text{C}-\text{CF}$ ) and alcohol groups ( $\text{C}-\text{OH}$ ) well accounted for the peaks at  $287.2 \pm 0.3$  eV and  $286.3 \pm 0.2$  eV. Finally, the component at  $285.1 \pm 0.2$  eV had a double nature, too: it was attributed to unsubstituted carbons in a quaternary fluorinated environment ( $\text{C}-\text{C}$ ) and to adventitious hydrocarbon contaminants. All these attributions are in agreement with literature [1–4].

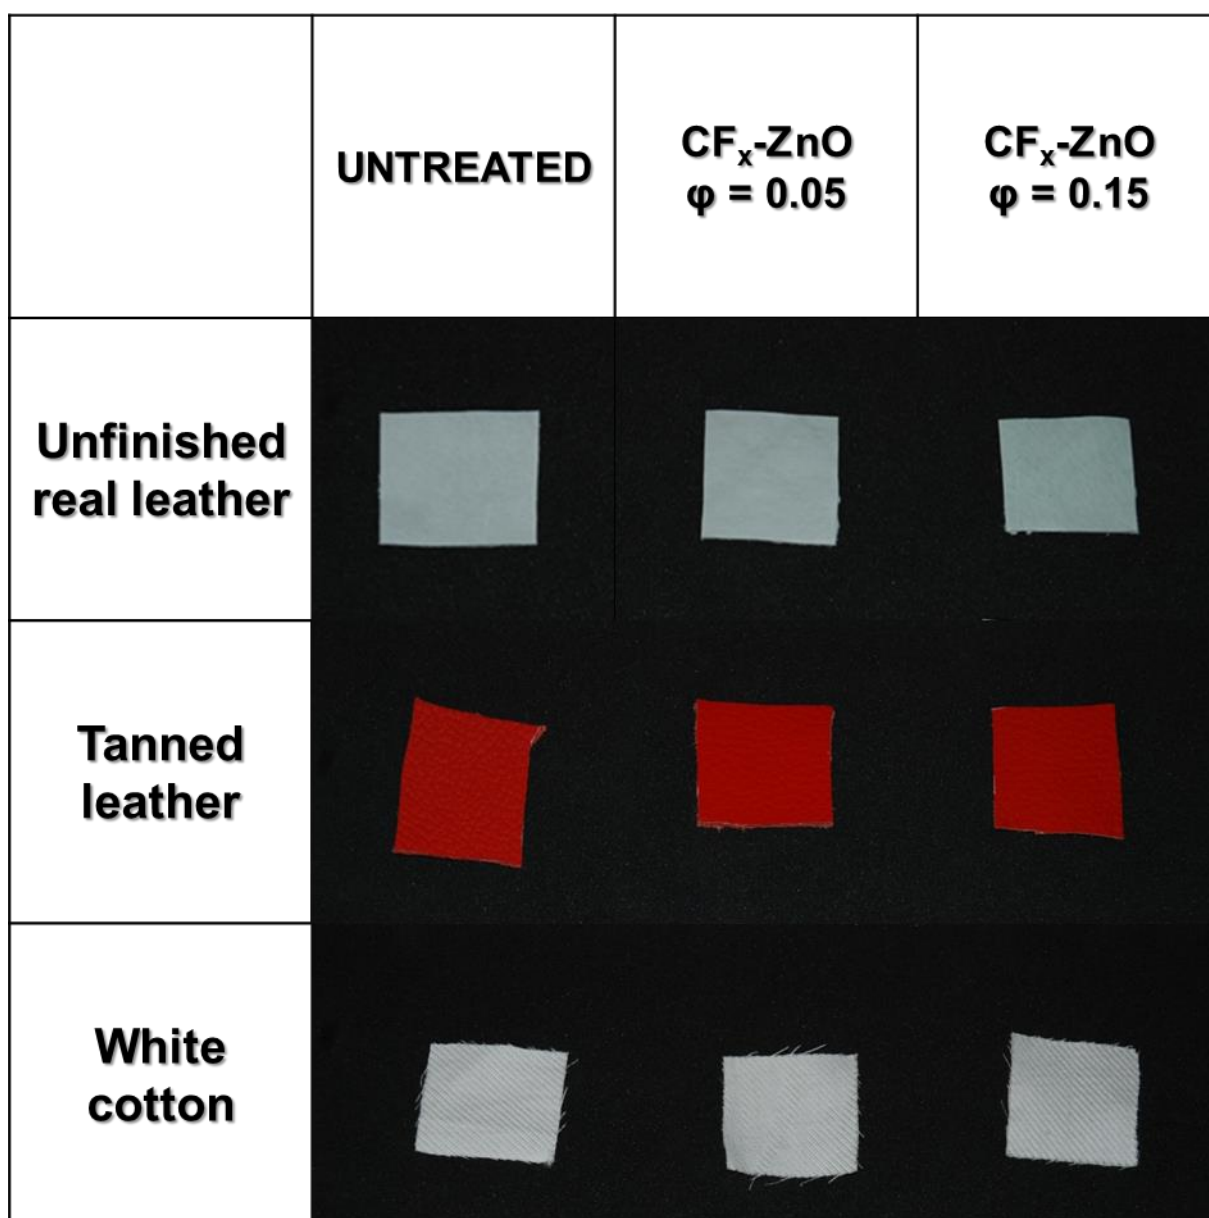

**Figure S3.** Real textile materials modified with ZnO-fluoropolymer nanocomposites at different inorganic loading.

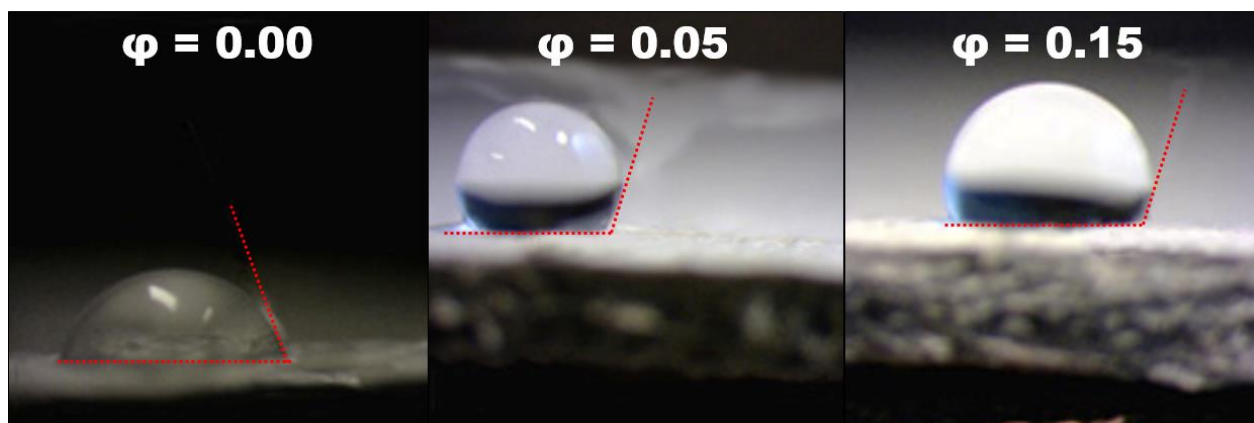

**Figure S4.** Water contact angle measurement on unfinished real leather modified with ZnO-fluoropolymer nanocomposites at different inorganic loading. Measured values are:  $69.5 \pm 0.5^\circ$  at  $\varphi = 0$ ,  $114.1 \pm 0.5^\circ$  at  $\varphi = 0.05$ , and  $103.5 \pm 0.5^\circ$  at  $\varphi = 0.15$ .

## References

1. Cioffi, N.; Losito, I.; Torsi, L.; Farella, I.; Valentini, A.; Sabbatini, L.; Zambonin, P. G.; Bleve-Zacheo, T. Analysis of the Surface Chemical Composition and Morphological Structure of Vapor-Sensing Gold-Fluoropolymer Nanocomposites. *Chem. Mater.* **2002**, *14*, 804–811, doi:10.1021/cm0111940.
2. Wagner, C. D. *Handbook of x-ray photoelectron spectroscopy: a reference book of standard data for use in x-ray photoelectron spectroscopy*; Perkin-Elmer Corp.: Waltham, MA, USA 1979.
3. NIST XPS Database Available online: <http://srdata.nist.gov/xps> (accessed on 3 December 2017).
4. Cioffi, N.; Ditaranto, N.; Torsi, L.; Picca, R. A.; Sabbatini, L.; Valentini, A.; Novello, L.; Tantillo, G.; Bleve-Zacheo, T.; Zambonin, P. G. Analytical characterization of bioactive fluoropolymer ultra-thin coatings modified by copper nanoparticles. *Anal. Bioanal. Chem.* **2005**, *381*, 607–616, doi:10.1007/s00216-004-2761-4.
